# Supplementary material
Source: PubMed Central journal article supplement (PMC3198340)
Supplement: 1114275108_pnas.201114275SI.pdf [file 1114275108_pnas.201114275SI.pdf]

# Supporting Information

Gillespie et al. 10.1073/pnas.1114275108

## SI Methods

The PCR array data provided by Qiagen regarding the primers used for the *TACR1* transcripts in the array are as follows:

| Transcript       | RefSeq    | Catalog no. | Amplicon size | Reference position |
|------------------|-----------|-------------|---------------|--------------------|
| fl- <i>TACR1</i> | NM_001058 | PPH68645A   | 58            | 4264–4285          |
| tr- <i>TACR1</i> | NM_015727 | PPH68646A   | 80            | 1581–1604          |

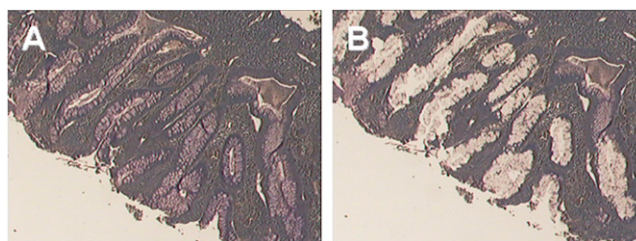

Fig. S1. Colonic epithelium stained with Paradise Plus stain before (A) and after (B) microdissection by laser capture microscopy showing selective removal of epithelium.

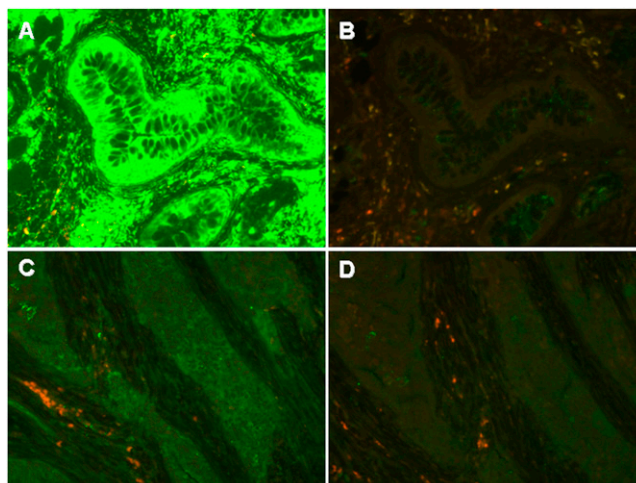

Fig. S2. Specificity of the two NK-1R antibodies: fluorescent microscopy images showing the antibodies binding to human colon carcinoma tissue with and without preincubation with blocking peptides. Antibody targeting the internal epitope of NK-1R binds colon sections without (A) but not with (B) preincubation with blocking peptide. Antibody targeting the C-terminal epitope of NK-1R binds colon sections without (C) but not with (D) blocking peptide. Exposure time = 500 ms. Orange tissue autofluorescence is evident in some sections and does not represent binding.

**Table S1. PCR array genes that did not show significant changes among groups, with fold changes and *P* values**

| Gene           | QC vs. HGD  |                | QC vs. CA   |                | HGD vs. CA  |                |
|----------------|-------------|----------------|-------------|----------------|-------------|----------------|
|                | Fold change | <i>P</i> value | Fold change | <i>P</i> value | Fold change | <i>P</i> value |
| <i>ALOX5</i>   | 0.85        | 0.88           | 2.00        | 0.37           | 2.36        | 0.44           |
| <i>BAD</i>     |             | NA             |             | NA             |             | NA             |
| <i>BCL2</i>    | 0.44        | 0.26           | 0.52        | 0.35           | 1.18        | 0.80           |
| <i>BCL2L1</i>  | 0.56        | 0.11           | 1.28        | 0.51           | 2.30        | 0.07           |
| <i>CAT</i>     | 0.60        | 0.37           | 0.91        | 0.83           | 1.52        | 0.23           |
| <i>CCL2</i>    | 1.77        | 0.49           | 4.11        | 0.26           | 2.33        | 0.42           |
| <i>CCNB1</i>   | 1.43        | 0.71           | 2.27        | 0.35           | 1.58        | 0.63           |
| <i>CCND1</i>   |             | NA             |             | NA             |             | NA             |
| <i>CD44</i>    |             | NA             |             | NA             |             | NA             |
| <i>CD74</i>    | 2.60        | 0.30           | 2.68        | 0.45           | 1.03        | 0.98           |
| <i>CDH1</i>    | 1.65        | 0.51           | 3.16        | 0.45           | 1.92        | 0.58           |
| <i>CDKN1A</i>  | 0.68        | 0.31           | 0.99        | 0.98           | 1.45        | 0.49           |
| <i>CHUK</i>    | 0.99        | 0.99           | 2.71        | 0.31           | 2.75        | 0.13           |
| <i>CXCL10</i>  | 0.34        | 0.29           | 0.47        | 0.06           | 1.36        | 0.70           |
| <i>CXCL12</i>  | 0.37        | 0.06           | 0.79        | 0.68           | 2.14        | 0.30           |
| <i>CXCR4</i>   | 1.79        | 0.64           | 1.49        | 0.64           | 0.84        | 0.84           |
| <i>CYP24A1</i> |             | NA             |             | NA             |             | NA             |
| <i>CYP27B1</i> | 0.34        | 0.32           | 1.97        | 0.66           | 5.82        | 0.16           |
| <i>EGFR</i>    | 6.59        | 0.19           | 2.36        | 0.46           | 0.36        | 0.42           |
| <i>EPAS1</i>   |             | NA             |             | NA             |             | NA             |
| <i>EPCAM</i>   | 1.47        | 0.79           | 0.93        | 0.97           | 0.63        | 0.64           |
| <i>GPX1</i>    |             | NA             |             | NA             |             | NA             |
| <i>HIF1A</i>   | 2.64        | 0.29           | 3.73        | 0.19           | 1.41        | 0.77           |
| <i>ICAM1</i>   | 0.55        | 0.43           | 1.12        | 0.87           | 2.03        | 0.53           |
| <i>IGF1</i>    | 0.33        | 0.23           | 0.51        | 0.41           | 1.56        | 0.49           |
| <i>IKBKB</i>   | 0.55        | 0.30           | 1.39        | 0.73           | 2.53        | 0.30           |
| <i>IKBKE</i>   | 0.38        | 0.36           | 1.65        | 0.35           | 4.35        | 0.20           |
| <i>IL1B</i>    | 0.51        | 0.28           | 0.50        | 0.37           | 0.97        | 0.97           |
| <i>IL2</i>     | 0.22        | 0.16           | 0.58        | 0.44           | 2.60        | 0.50           |
| <i>IL6</i>     | 0.30        | 0.37           | 1.13        | 0.92           | 3.73        | 0.34           |
| <i>IL6R</i>    | 0.33        | 0.07           | 0.34        | 0.13           | 1.06        | 0.93           |
| <i>IL8</i>     | 0.86        | 0.85           | 1.36        | 0.76           | 1.58        | 0.35           |
| <i>IL8RA</i>   |             | NA             |             | NA             |             | NA             |
| <i>IL8RB</i>   |             | NA             |             | NA             |             | NA             |
| <i>MCL1</i>    | 2.33        | 0.53           | 0.56        | 0.78           | 0.24        | 0.46           |
| <i>MIF</i>     | 1.45        | 0.56           | 2.46        | 0.22           | 1.69        | 0.51           |
| <i>MMP1</i>    |             | NA             |             | NA             |             | NA             |
| <i>MMP13</i>   | 2.39        | 0.47           | 4.35        | 0.24           | 1.82        | 0.49           |
| <i>MMP2</i>    | 0.71        | 0.44           | 1.92        | 0.34           | 2.71        | 0.20           |
| <i>MMP7</i>    | 1.04        | 0.92           | 8.46        | 0.26           | 8.11        | 0.26           |
| <i>MMP9</i>    | 1.65        | 0.37           | 3.12        | 0.14           | 1.89        | 0.46           |
| <i>MSH2</i>    | 2.36        | 0.35           | 4.66        | 0.14           | 1.97        | 0.47           |
| <i>NFKB1</i>   |             | NA             |             | NA             |             | NA             |
| <i>NFKBIA</i>  | 2.08        | 0.21           | 6.32        | 0.12           | 3.03        | 0.14           |
| <i>NOS2</i>    | 1.09        | 0.93           | 0.93        | 0.94           | 0.86        | 0.86           |
| <i>PDGFA</i>   | 2.08        | 0.59           | 4.06        | 0.29           | 1.95        | 0.57           |
| <i>PDGFB</i>   | 1.65        | 0.08           | 5.13        | 0.10           | 3.12        | 0.19           |
| <i>PDGFRA</i>  | 0.46        | 0.18           | 0.71        | 0.79           | 1.54        | 0.67           |
| <i>PDGFRB</i>  |             | NA             |             | NA             |             | NA             |
| <i>PTGS2</i>   | 4.66        | 0.39           | 8.94        | 0.09           | 1.92        | 0.64           |
| <i>RAF1</i>    |             | NA             |             | NA             | 1.36        | 0.72           |
| <i>RELA</i>    | 1.39        | 0.38           | 1.07        | 0.95           | 0.77        | 0.80           |
| <i>RELB</i>    | 0.28        | 0.09           | 0.51        | 0.44           | 1.82        | 0.26           |
| <i>SELL</i>    |             | NA             |             | NA             |             | NA             |
| <i>SMAD2</i>   | 1.07        | 0.94           | 3.94        | 0.48           | 3.68        | 0.25           |
| <i>SMAD4</i>   |             | NA             |             | NA             |             | NA             |
| <i>SOD1</i>    | 1.82        | 0.39           | 1.03        | 0.99           | 0.57        | 0.70           |
| <i>SOD2</i>    | 9.45        | 0.10           | 13.93       | 0.09           | 1.47        | 0.36           |
| <i>STAT3</i>   | 2.36        | 0.25           | 6.68        | 0.08           | 2.83        | 0.22           |
| <i>TAC1</i>    |             | NA             |             | NA             |             | NA             |
